# Supplementary material
Source: PubMed Central journal article supplement (PMC3067091)
Supplement: supp_55_3_954__1.pdf [file supp_55_3_954__1.pdf]

**Table S1: Elution times, measured and expected masses of the seven disulfide bridge isomers of chimera 1.**

|             | <b>Retention time, min</b> | <b>Detected mass*, Da</b> |
|-------------|----------------------------|---------------------------|
| <b>C1.1</b> | 21.258                     | 4705                      |
| <b>C1.2</b> | 21.650                     | 4705                      |
| <b>C1.3</b> | 22.667                     | 4705                      |
| <b>C1.4</b> | 23.300                     | 4705                      |
| <b>C1.5</b> | 23.842                     | 4705                      |
| <b>C1.6</b> | 24.250                     | 4705                      |
| <b>C1.7</b> | 25.125                     | 4705                      |

\*: Average mass expected: 4704 Da + mass of H<sup>+</sup>

**Table S2: Salt sensitivity of the antimicrobial activities of HBD2, HBD3 and chimeras****C3 and C5.** The salt sensitivity was tested against *E. coli* ATCC35218 and *S. aureus*ATCC12600 by measuring the MBC and LD<sub>90</sub> values in presence of 50, 100 and 150 mMsodium chloride. MBC, minimal bactericidal concentration [ $\mu\text{g/ml}$ ]; LD<sub>90</sub>: 90 % lethal dose[ $\mu\text{g/ml}$ ].

|                   | <i>E. coli</i> ATCC 35218 |                  | <i>S. aureus</i> ATCC 12600 |                  |
|-------------------|---------------------------|------------------|-----------------------------|------------------|
|                   | MBC                       | LD <sub>90</sub> | MBC                         | LD <sub>90</sub> |
| <b>HBD2</b>       |                           |                  |                             |                  |
| -                 | 0.78                      | 0.2              | 6.25                        | 1.56             |
| 50 mM NaCl        | 3.13                      | 0.78             | 25                          | 25               |
| 100 mM NaCl       | 12.5                      | 3.13             | >100                        | 50               |
| 150 mM NaCl       | >100                      | 25               | >100                        | >100             |
| <b>HBD3</b>       |                           |                  |                             |                  |
| -                 | 1.56                      | 0.39             | 1.56                        | 0.78             |
| 50 mM NaCl        | 6.25                      | 1.56             | 1.56                        | 0.78             |
| 100 mM NaCl       | >100                      | 12.5             | 6.25                        | 1.56             |
| 150 mM NaCl       | >100                      | >100             | 12.5                        | 6.25             |
| <b>Chimera C3</b> |                           |                  |                             |                  |
| -                 | 0.2                       | 0.1              | 0.78                        | 0.2              |
| 50 mM NaCl        | 1.56                      | 0.1              | 1.56                        | 0.78             |
| 100 mM NaCl       | 25                        | 6.25             | 6.25                        | 3.13             |
| 150 mM NaCl       | >100                      | 12.5             | 50                          | 12.5             |
| <b>Chimera C5</b> |                           |                  |                             |                  |
| -                 | 0.2                       | 0.05             | 0.39                        | 0.1              |
| 50 mM NaCl        | 0.78                      | 0.1              | 0.39                        | 0.1              |
| 100 mM NaCl       | 0.78                      | 0.2              | 0.39                        | 0.2              |
| 150 mM NaCl       | 1.56                      | 0.2              | 0.39                        | 0.1              |
